# Supplementary material for: PGlu-Modified Nanocrystalline Cellulose Improves Mechanical Properties, Biocompatibility, and Mineralization of Polyester-Based Composites
Source: PubMed Central journal article supplement (PMC6829302; doi:10.3390/ma12203435), 2019-10-21
Supplement: materials-12-03435-s001.pdf [file materials-12-03435-s001.pdf]

# PGlu-Modified Nanocrystalline Cellulose Improves Mechanical Properties, Biocompatibility, and Mineralization of Polyester-Based Composites

Mariia Stepanova <sup>1</sup>, Iliia Averianov <sup>1</sup>, Mikhail Serdobintsev <sup>2</sup>, Iosif Gofman <sup>1</sup>, Natalya Blum <sup>3</sup>, Natalya Semenova <sup>3</sup>, Yuliya Nashchekina <sup>4</sup>, Tatiana Vinogradova <sup>2</sup>, Viktor Korzhikov-Vlakh <sup>1,5</sup>, Mikko Karttunen <sup>1,6,7,8</sup> and Evgenia Korzhikova-Vlakh <sup>1,5,\*</sup>

## Crystallinity Evaluation

As expected, no diffraction reflexes were observed for PDLLA, indicating the amorphous nature of the polymer. The broad halo at  $2\theta$  equal to  $10.0\text{--}25.0^\circ$  was detected. The addition of NCC led to the appearance of the characteristic peak near  $23.8^\circ$  against the background of an amorphous halo. In turn, PCL specimens were characterized with the presence of fairly pronounced diffraction peaks located at  $21.4^\circ$ ,  $22.1^\circ$ , and  $23.8^\circ$ . The results are coincided with previously published data [1,2]. This indicates the semi-crystalline nature of the polymer and composite films. The contents of the crystalline and amorphous regions for pure PCL were found to be 35% and 65%, respectively. For PCL-based composite materials containing from 5% to 15% of NCC, these values varied in the range of 40–57% and 60–43%, respectively.

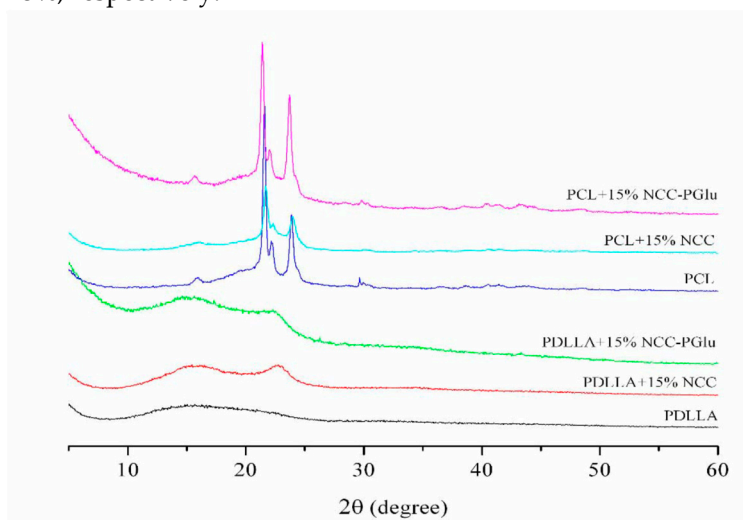

**Figure S1.** XRD patterns of pure PDLLA and PCL, and their composites with original and modified NCC.

## References

1. Korzhikov, V.; Averianov, I.; Litvinchuk, E.; Tennikova, T.B.. Polyester-based microparticles of different hydrophobicity: the patterns of lipophilic drug entrapment and release. *J. Microencapsul.* **2016**, *33*, 199–208.
2. Guang-Mei, C.; Tie-Mei, Z.; Lei, C.; Yi-Ping, H. Crystallization properties of polycaprolactone induced by different hydroxyapatite nano-particles. *Asian J. Chem.* **2010**, *22*, 5902–5912.

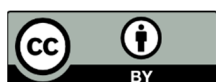

© 2019 by the authors. Submitted for possible open access publication under the terms and conditions of the Creative Commons Attribution (CC BY) license (<http://creativecommons.org/licenses/by/4.0/>).
